# Supplementary material for: Topography, Soil Elemental Stoichiometry and Landscape Structure Determine the Nitrogen and Phosphorus Loadings of Agricultural Catchments in the Subtropics
Source: MDPI journal article supplement (doi:10.3390/land12030568), 2023-02-26
Supplement: s1 [file s1]

# *Land*

Supporting Information for

**Topography, soil elemental stoichiometry and landscape structure determine the nitrogen and phosphorus loadings of agricultural catchments in the subtropics**

Yong Li <sup>1,2,3</sup>, Yi Wang <sup>4</sup>, Ji Liu <sup>2</sup>, Meihui Wang <sup>5</sup>, Jianlin Shen <sup>2</sup>, Xinliang Liu <sup>2</sup>

<sup>1</sup> State Key Laboratory of Atmospheric Boundary Layer Physics and Atmospheric Chemistry, Institute of Atmospheric Physics, Chinese Academy of Sciences, Beijing 100029, China

<sup>2</sup> Key Laboratory of Agro-ecological Processes in Subtropical Regions and Changsha Research Station for Agricultural & Environmental Monitoring, Institute of Subtropical Agriculture, Chinese Academy of Sciences, Hunan 410125, China

<sup>3</sup> Faculty of Veterinary and Agricultural Sciences, The University of Melbourne, Victoria 3010, Australia

<sup>4</sup> College of Resources and Environmental Engineering, Ludong University, Yantai 264025, China

<sup>5</sup> College of Geography, Nanning Normal University, Nanning, China

## **Contents of this file**

Tables S1 to S2

Figures S1 to S6

## **Additional Supporting Information (Files uploaded separately)**

Datasets S1 to S2

## Introduction

This supporting information file contains two tables, six figures and two datasets for the nine studied agricultural catchments (FULING, FEIYUE, XINGSHA, JIUXIYUAN, GUANJIA, JIANSHAN, TUOJIA, NANYUE and WANGZIYUAN) in Jinjing Town of Hunan Province in the subtropics of Central China.

[Table S1](#) presented the descriptive statistics (e.g., mean, median, min, max, standard deviation, excess kurtosis and skewness) of the stream flow-weighted total nitrogen and phosphorus concentrations (TN<sub>wc</sub>, mg N L<sup>-1</sup> and TP<sub>wc</sub> mg P L<sup>-1</sup>) and the indicators of topography, soil and landscape of the nine studied catchments. The topography characteristics include the area (AREA), average elevation (ELEVATION, m), average slope (SLOPE, %) and average elevation-relief ratio (ERR, dimensionless) of the catchments. Soil properties or indicators include the soil pH (pH), the areal average contents of sand (SAND: 0.05 - 2 mm, %), silt (SILT: 0.002 - 0.05 mm, %), clay (CLAY: <0.002 mm, %), soil organic carbon (SOC, g C kg<sup>-1</sup>), total soil nitrogen (TSN, g N kg<sup>-1</sup>) and total soil phosphorus (TSP, g P kg<sup>-1</sup>), and the areal average elemental ratios of soil carbon to nitrogen (SOIL\_CNR, mol mol<sup>-1</sup>), soil carbon to phosphorus (SOIL\_CPR, mol mol<sup>-1</sup>) and soil nitrogen to phosphorus (SOIL\_NPR, mol mol<sup>-1</sup>). The landscape indicators include the landscape composition: the areal percentages of woodlands (Woodland, %), paddy fields (Paddy, %), tea fields (Tea, %), residential areas (Resident, %), roads (Road, %), ponds (Pond, %) and rivers (River, %), the landscape configuration: the largest patch index (LPI, %), the edge density (ED, m per ha), the patch density (PD, patches per 100 ha), the aggregation index (AI, %), the patch cohesion index (COHESION, no dimension), the related circumscribing circle index (CIRCLE, no dimension), the landscape shape index (SHAPE, no dimension), the fractal dimension index (FRAC, no dimension), and the Shannon's diversity index (SHDI, no dimension), and the landscape management: the human population density

(POPU, people per ha), the livestock population density (LSD\_AU, AU per ha), the N input density (Ninput, kg N ha<sup>-1</sup> yr<sup>-1</sup>) and the P input density (Pinput, kg P ha<sup>-1</sup> yr<sup>-1</sup>). The same abbreviations apply hereafter. These basic statistical analyses were carried out by using the R software.

Table S2 provided the spatial autocorrelations of TN\_wc, TP\_wc and the indicators of topography, soil and landscape in the nine studied catchments. These spatial autocorrelation analyses were carried out by using the ESRI ARCGIS software.

Figures S1-S3 showed the Pearson's correlation matrices of TN\_wc and the indicators of topography, soil and landscape in the nine studied catchments. These correlation analyses were carried out by using the R software.

Figures S4-S6 showed the Pearson's correlation matrices of TP\_wc and the indicators of topography, soil and landscape in the nine studied catchments. These correlation analyses were carried out by using the R software.

Dataset S1, named as WRR\_yli\_ds01.docx, presented the summary of the observed annual stream flow (Flow, mm yr<sup>-1</sup>) and annual average concentrations of total nitrogen (TN, mg L<sup>-1</sup>) and total phosphorus (TP, mg L<sup>-1</sup>) in stream water of the nine studied catchments during 2011-2016. It is in a Microsoft word 2010 format. In this dataset, all catchments had six years observations (2011-2016), except for XINGSHA and JIUXIYUAN with only five years observations (2012-2016) due to lacking resources when we started our study.

Dataset S2, named as WRR\_yli\_ds02.xlsx, provided the full calculation details for the nitrogen (Ninput) and phosphorus (Pinput) input densities in the nine studied catchments. It is in a Microsoft excel 2010 format.

**Table S1.** Descriptive statistics of the stream flow-weighted total nitrogen and phosphorus concentrations and the indicators of topography, soil and landscape of the nine studied catchments.

| Item      | Mean   | Median | Min   | Max    | Standard deviation | Excess kurtosis | Skewness |
|-----------|--------|--------|-------|--------|--------------------|-----------------|----------|
| TN_wc     | 2.708  | 2.999  | 1.322 | 3.440  | 0.756              | -1.082          | -0.739   |
| TP_wc     | 0.176  | 0.183  | 0.049 | 0.282  | 0.076              | -0.989          | -0.096   |
| AREA      | 24.90  | 9.69   | 0.09  | 73.36  | 25.51              | -0.844          | 0.850    |
| ELEVATION | 135.92 | 122.64 | 98.28 | 187.43 | 33.45              | -1.691          | 0.434    |
| SLOPE     | 17.65  | 14.72  | 11.86 | 27.78  | 5.964              | -1.340          | 0.813    |
| ERR       | 0.432  | 0.423  | 0.373 | 0.513  | 0.039              | 0.904           | 0.783    |
| SAND      | 29.81  | 31.29  | 17.71 | 48.52  | 9.164              | 0.181           | 0.664    |
| SILT      | 40.43  | 37.50  | 27.29 | 55.21  | 8.041              | -0.162          | 0.427    |
| CLAY      | 23.75  | 23.29  | 19.98 | 27.43  | 2.166              | -0.215          | 0.118    |
| pH        | 3.912  | 3.940  | 3.730 | 4.050  | 0.089              | 0.645           | -0.722   |
| SOC       | 8.210  | 7.973  | 6.741 | 10.151 | 1.087              | -0.799          | 0.513    |
| TSN       | 1.494  | 1.529  | 1.166 | 1.785  | 0.187              | -0.424          | -0.427   |
| TSP       | 0.424  | 0.436  | 0.356 | 0.456  | 0.031              | 0.748           | -1.208   |
| SOIL_CNR  | 9.579  | 9.640  | 8.520 | 10.850 | 0.873              | -1.745          | 0.145    |
| SOIL_CPR  | 82.54  | 81.05  | 70.29 | 99.56  | 9.035              | -0.498          | 0.603    |
| SOIL_NPR  | 10.24  | 9.97   | 8.49  | 12.90  | 1.453              | -0.775          | 0.577    |
| Woodland  | 67.28  | 60.15  | 51.84 | 99.82  | 14.72              | 1.080           | 1.309    |
| Paddy     | 24.57  | 29.32  | 0.00  | 34.79  | 10.73              | 1.732           | -1.454   |
| Tea       | 3.780  | 4.520  | 0.000 | 10.370 | 3.065              | 0.868           | 0.866    |
| Resident  | 2.294  | 2.890  | 0.000 | 3.270  | 1.030              | 1.176           | -1.353   |
| Road      | 0.254  | 0.240  | 0.000 | 0.910  | 0.255              | 5.079           | 1.998    |
| Pond      | 1.578  | 1.530  | 0.000 | 2.750  | 0.813              | -0.114          | -0.464   |
| River     | 0.242  | 0.220  | 0.010 | 0.620  | 0.202              | -0.680          | 0.406    |
| LPI       | 49.69  | 42.42  | 27.22 | 99.82  | 21.79              | 1.868           | 1.446    |
| ED        | 167.26 | 182.22 | 12.14 | 244.21 | 59.52              | 5.796           | -2.070   |
| CIRCLE    | 0.569  | 0.566  | 0.540 | 0.594  | 0.018              | -1.064          | 0.126    |
| SHAPE     | 1.546  | 1.490  | 1.430 | 1.840  | 0.121              | 3.316           | 1.789    |
| FRAC      | 1.118  | 1.106  | 1.099 | 1.215  | 0.035              | 8.392           | 2.865    |

|          |        |        |       |        |       |       |        |
|----------|--------|--------|-------|--------|-------|-------|--------|
| PD       | 61.10  | 63.82  | 20.23 | 101.20 | 21.68 | 0.805 | -0.113 |
| AI       | 95.76  | 95.44  | 93.94 | 99.26  | 1.357 | 5.469 | 1.958  |
| COHESION | 99.63  | 99.70  | 99.12 | 99.87  | 0.221 | 2.131 | -1.373 |
| SHDI     | 0.843  | 1.013  | 0.013 | 1.133  | 0.332 | 3.924 | -1.945 |
| LSD_AU   | 0.584  | 0.550  | 0.000 | 1.380  | 0.403 | 0.376 | 0.782  |
| POPU     | 2.517  | 2.420  | 0.000 | 4.650  | 1.234 | 1.151 | -0.425 |
| Ninput   | 178.80 | 196.92 | 38.93 | 273.66 | 67.41 | 0.673 | -0.859 |
| Pinput   | 25.19  | 26.10  | 1.34  | 46.65  | 12.71 | 0.440 | -0.154 |

**Table S2.** Spatial autocorrelations of the stream flow-weighted total nitrogen and phosphorus concentrations and the indicators of topography, soil and landscape of the nine studied catchments.

| <b>Indicator</b> | <b>Moran's Index</b> | <b>Expected Index</b> | <b>Variance</b> | <b>z-score</b> | <b>p-value</b> |
|------------------|----------------------|-----------------------|-----------------|----------------|----------------|
| TN_wc            | 0.175                | -0.143                | 0.019           | 2.308          | 0.021          |
| TP_wc            | 0.142                | -0.143                | 0.019           | 2.087          | 0.037          |
| Area             | -0.135               | -0.143                | 0.019           | 0.06           | 0.952          |
| ELEVATION        | 0.143                | -0.125                | 0.011           | 2.505          | 0.012          |
| ERR              | 0.135                | -0.125                | 0.011           | 2.453          | 0.013          |
| SLOPE            | 0.129                | -0.125                | 0.011           | 2.375          | 0.018          |
| SAND             | 0.246                | -0.143                | 0.018           | 2.867          | 0.004          |
| SILT             | 0.286                | -0.143                | 0.019           | 3.15           | 0.002          |
| CLAY             | -0.315               | -0.143                | 0.018           | -1.275         | 0.202          |
| pH               | -0.153               | -0.143                | 0.018           | -0.079         | 0.937          |
| SOC              | 0.248                | -0.143                | 0.019           | 2.843          | 0.004          |
| TSN              | 0.065                | -0.143                | 0.019           | 1.516          | 0.130          |
| TSP              | -0.136               | -0.143                | 0.018           | 0.053          | 0.958          |
| SOIL_CNR         | -0.203               | -0.143                | 0.019           | -0.436         | 0.663          |
| SOIL_CPR         | 0.12                 | -0.143                | 0.019           | 1.917          | 0.055          |
| SOIL_NPR         | 0.043                | -0.143                | 0.019           | 1.354          | 0.176          |
| Woodland         | 0.065                | -0.143                | 0.018           | 1.541          | 0.123          |
| Paddy            | 0.035                | -0.143                | 0.018           | 1.332          | 0.183          |
| Tea              | 0.061                | -0.143                | 0.018           | 1.516          | 0.130          |
| Resident         | 0.059                | -0.143                | 0.018           | 1.498          | 0.134          |
| Road             | -0.173               | -0.143                | 0.016           | -0.241         | 0.810          |
| Pond             | 0.06                 | -0.143                | 0.019           | 1.485          | 0.138          |
| River            | 0.013                | -0.143                | 0.019           | 1.142          | 0.254          |
| LPI              | 0.043                | -0.143                | 0.018           | 1.391          | 0.164          |
| ED               | -0.141               | -0.143                | 0.016           | 0.014          | 0.989          |
| PD               | -0.013               | -0.125                | 0.012           | 1.034          | 0.301          |
| AI               | -0.134               | -0.143                | 0.016           | 0.072          | 0.942          |
| COHESION         | -0.016               | -0.143                | 0.017           | 0.97           | 0.332          |
| CIRCLE           | 0.154                | -0.143                | 0.019           | 2.162          | 0.031          |
| SHAPE            | -0.099               | -0.143                | 0.017           | 0.333          | 0.739          |
| FRAC             | -0.21                | -0.143                | 0.015           | -0.548         | 0.583          |
| SHDI             | -0.046               | -0.143                | 0.017           | 0.746          | 0.456          |
| LSD_AU           | -0.054               | -0.143                | 0.018           | 0.657          | 0.511          |
| POPU             | -0.247               | -0.143                | 0.018           | -0.78          | 0.435          |
| Ninput           | 0.035                | -0.143                | 0.018           | 1.319          | 0.187          |
| Pinput           | -0.007               | -0.143                | 0.018           | 1.006          | 0.314          |

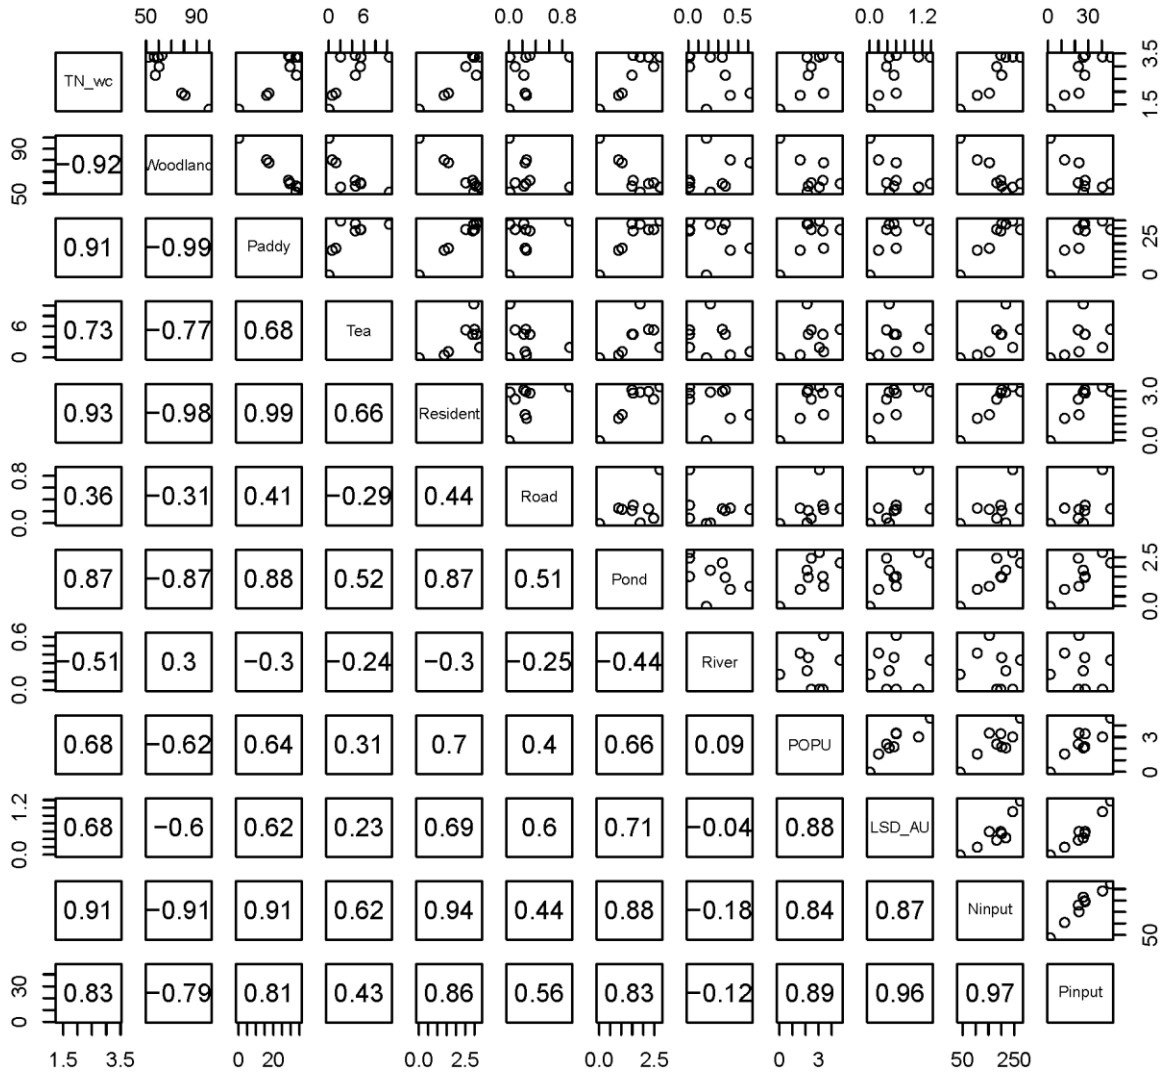

**Figure S1.** Pearson's correlation matrix of the stream flow-weighted total nitrogen concentration

and the landscape metrics for composition and management of the nine studied catchments.

Ninput and Pininput include N and P inputs from airborne deposition, fertilizer application and human & livestock faeces, respectively; and they are calculated in [Dataset S2](#).



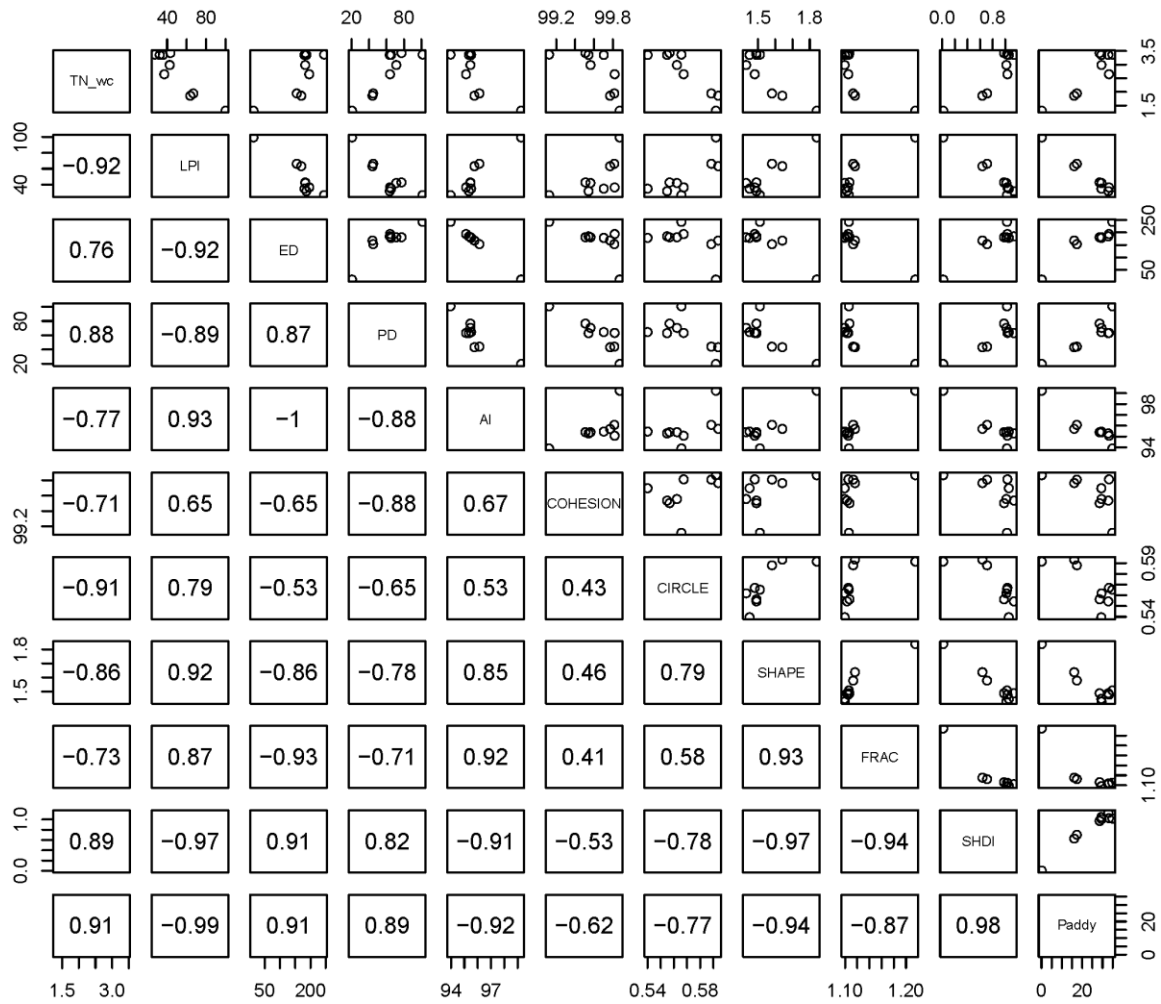

**Figure S2.** Pearson's correlation matrix of the stream flow-weighted total nitrogen concentration and the landscape metrics for configuration of the nine studied catchments. LPI, ED, PD, AI, COHESION, CIRCLE, SHAPE, FRAC and SHDI are defined in [Table 3](#).

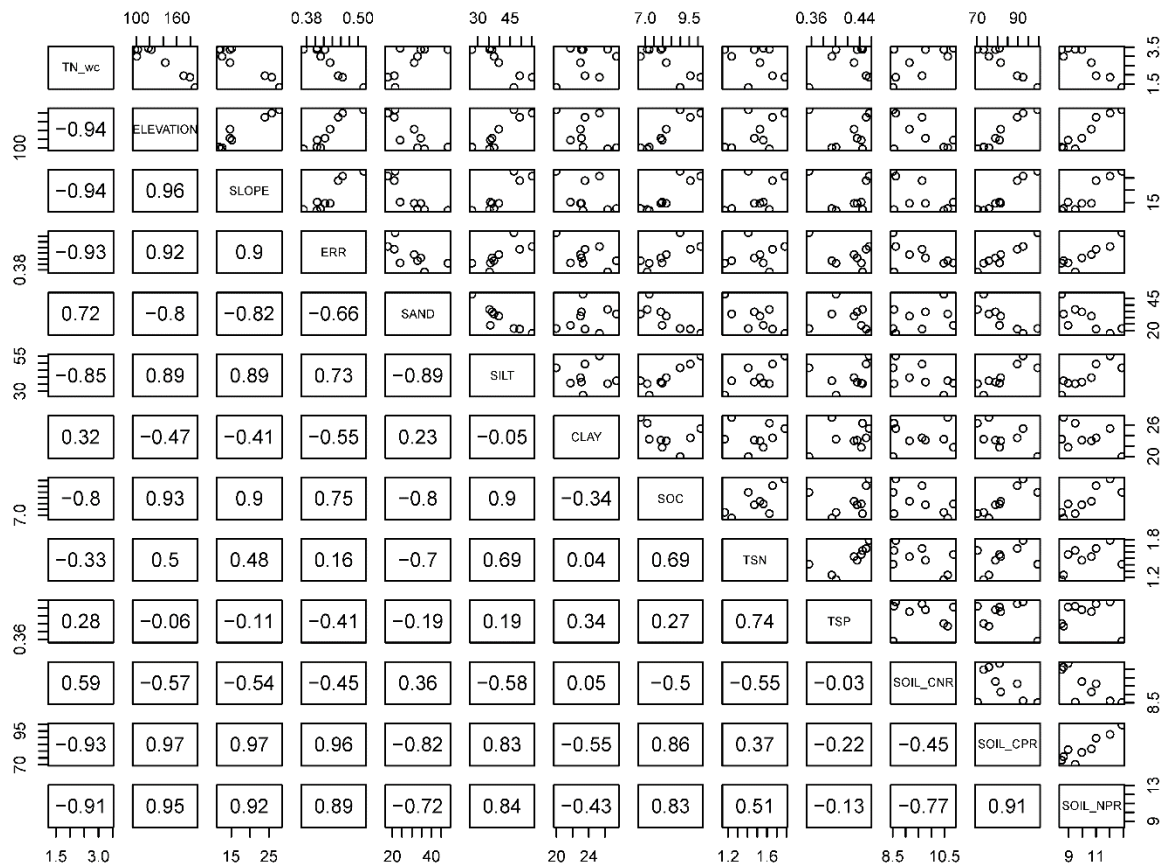

**Figure S3.** Pearson's correlation matrix of the stream flow-weighted total nitrogen concentration, the topographical characteristics and the soil properties of the nine studied catchments.

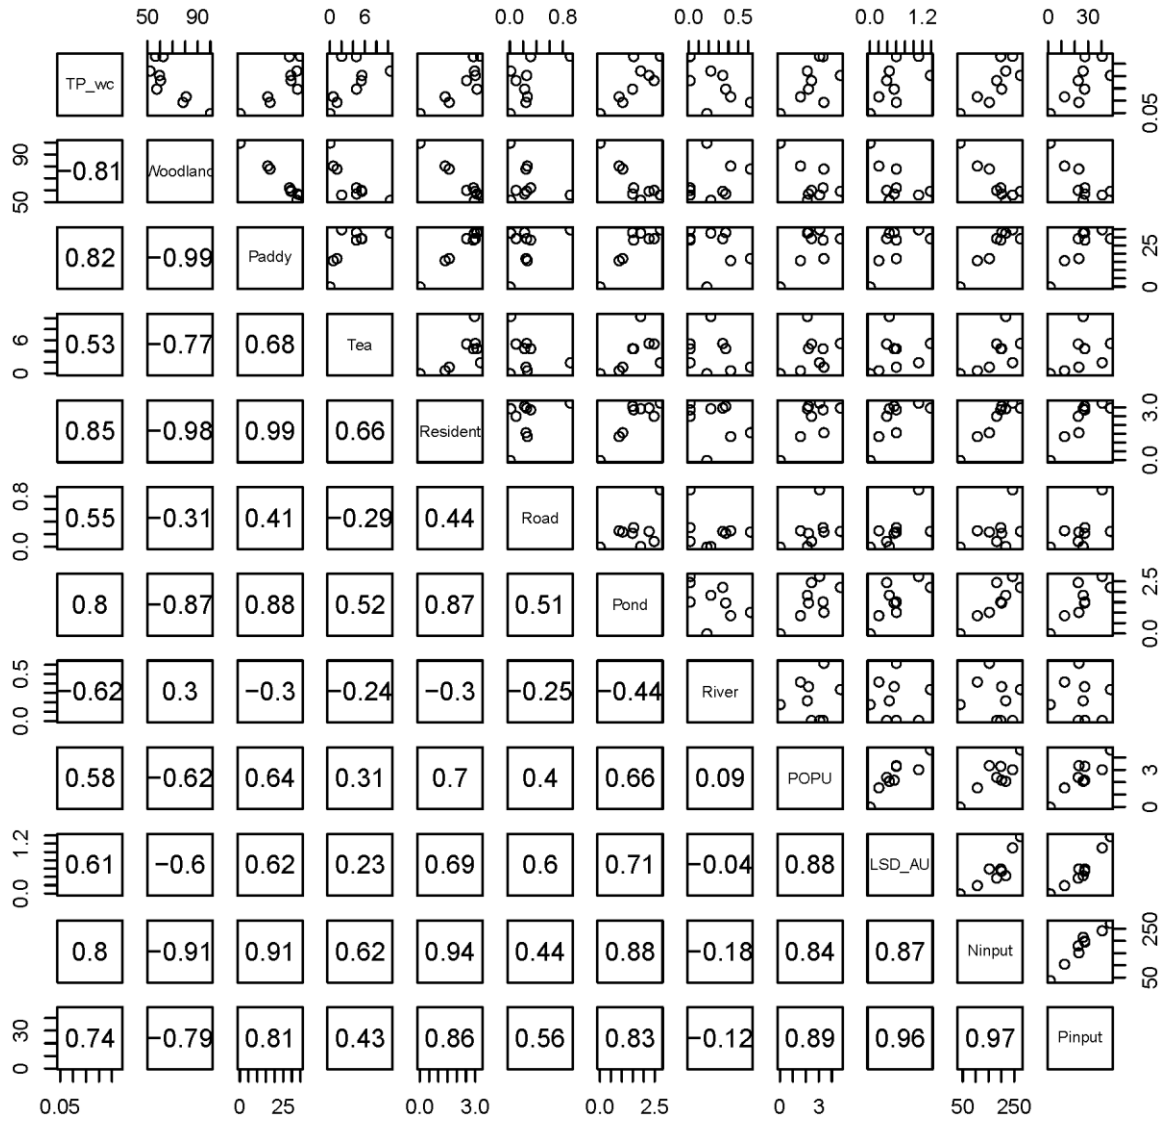

**Figure S4.** Pearson's correlation matrix of the stream flow-weighted total phosphorus concentration and the landscape metrics for composition and management of the nine studied catchments. Ninput and Pinput include N and P inputs from airborne deposition, fertilizer application and human & livestock faeces, respectively; and they are calculated in [Dataset S2](#).

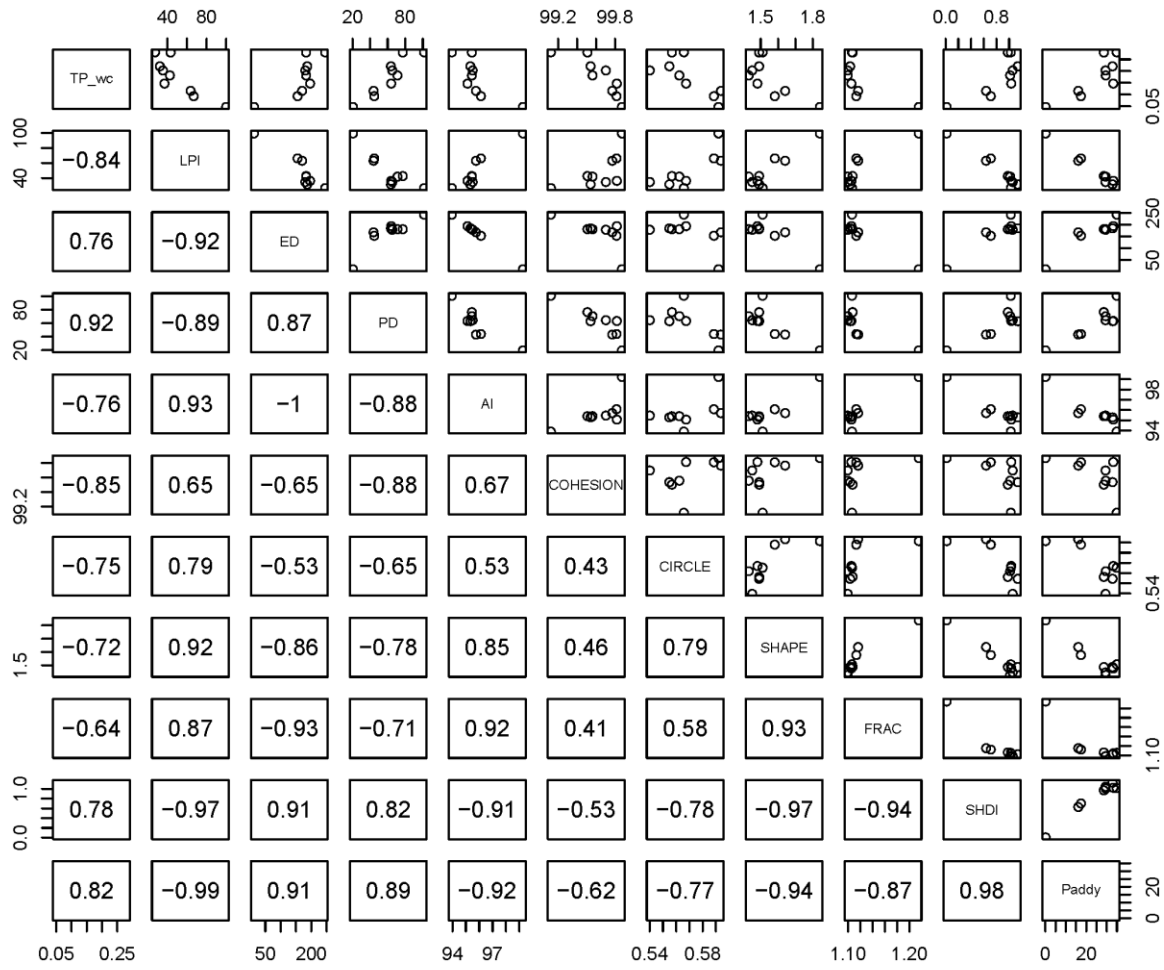

**Figure S5.** Pearson's correlation matrix of the stream flow-weighted total phosphorus concentration and the landscape metrics for configuration of the nine studied catchments. LPI, ED, PD, AI, COHESION, CIRCLE, SHAPE, FRAC and SHDI are defined in [Table 3](#).

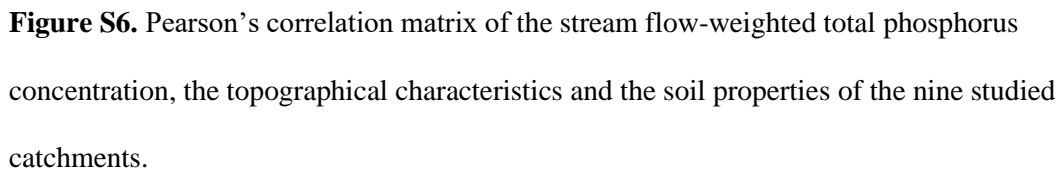

WRR\_yli\_ds01.docx (uploaded separately)

13

WRR\_yli\_ds02.xlsx (uploaded separately)
